# Supplementary material for: Chloroquine and bafilomycin A mimic lysosomal storage disorders and impair mTORC1 signalling
Source: Oxford University Press journal article supplement (doi:10.1042/bsr20200905), 2020-04-01
Supplement: bsr-2020-0905_supp.pdf [file bsr-2020-0905_supp.pdf]

Supplementary Figure 1.

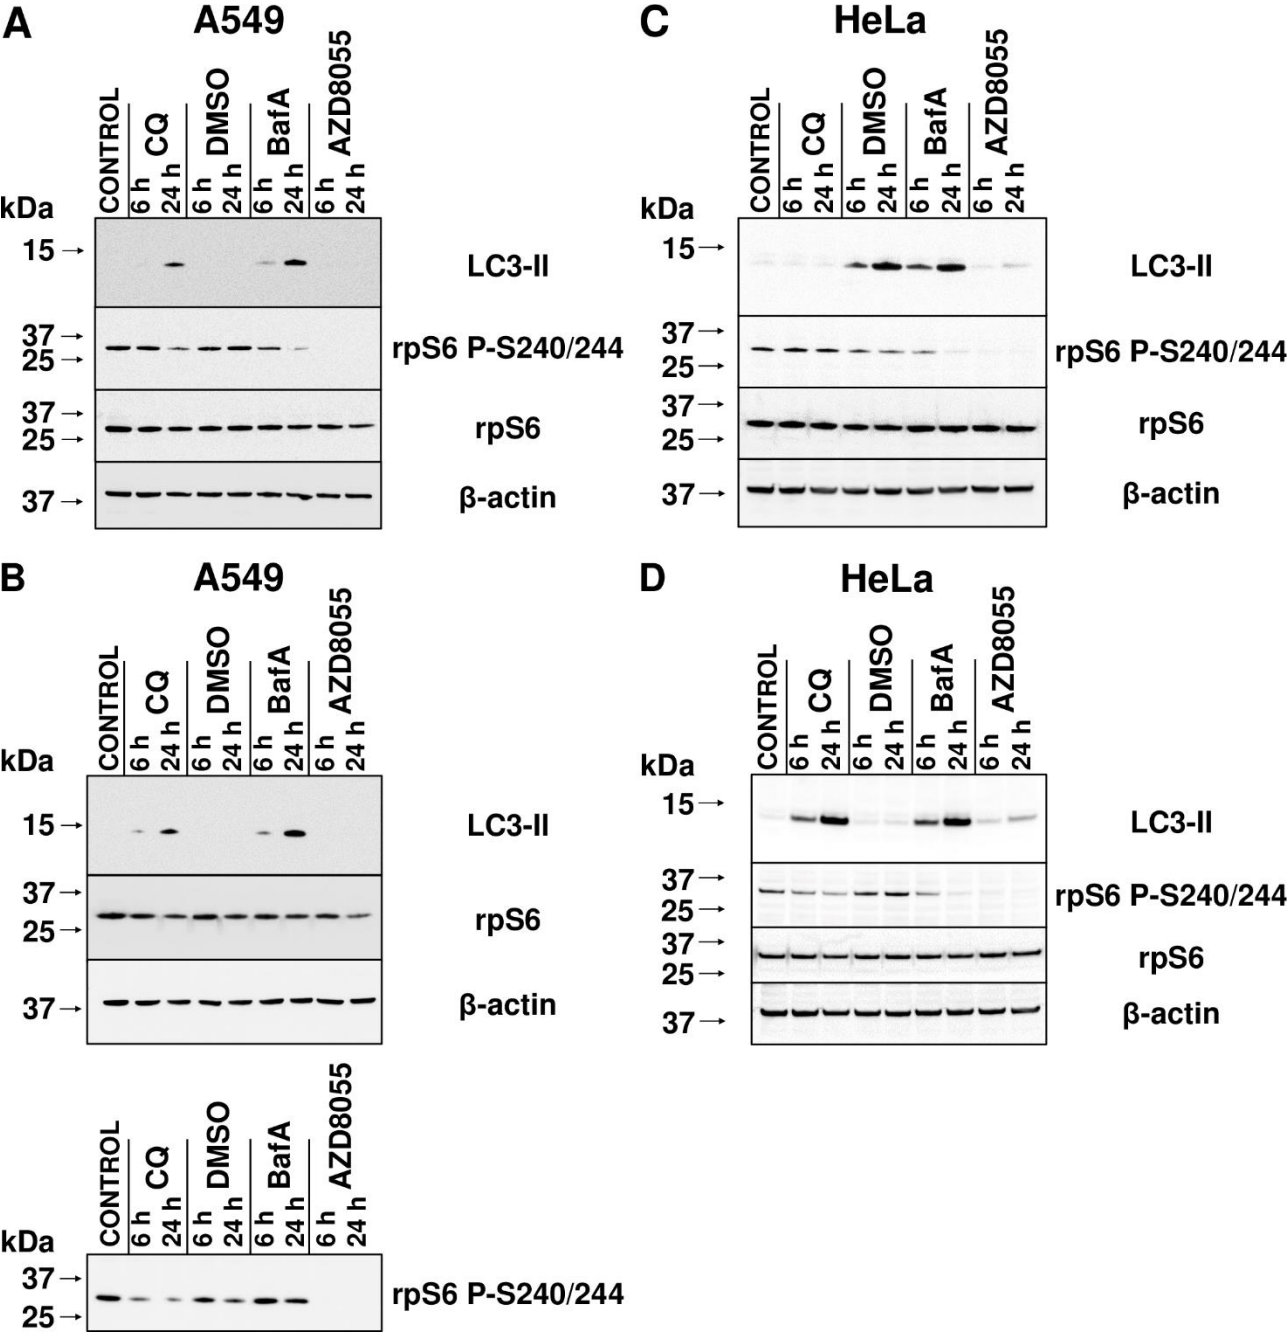

**Supplementary Figure 1. Replicate experiments from Figure 1. A. and B.** Replicate experiments in A549 cells. **C. and D.** Replicate experiments in HeLa cells. See legend to Figure 1 for further information. Please note alternative loading order when compared with Figure 1 in **B** (rpS6 P-240/244 immunoblot only) and **C**.

Supplementary Figure 2.

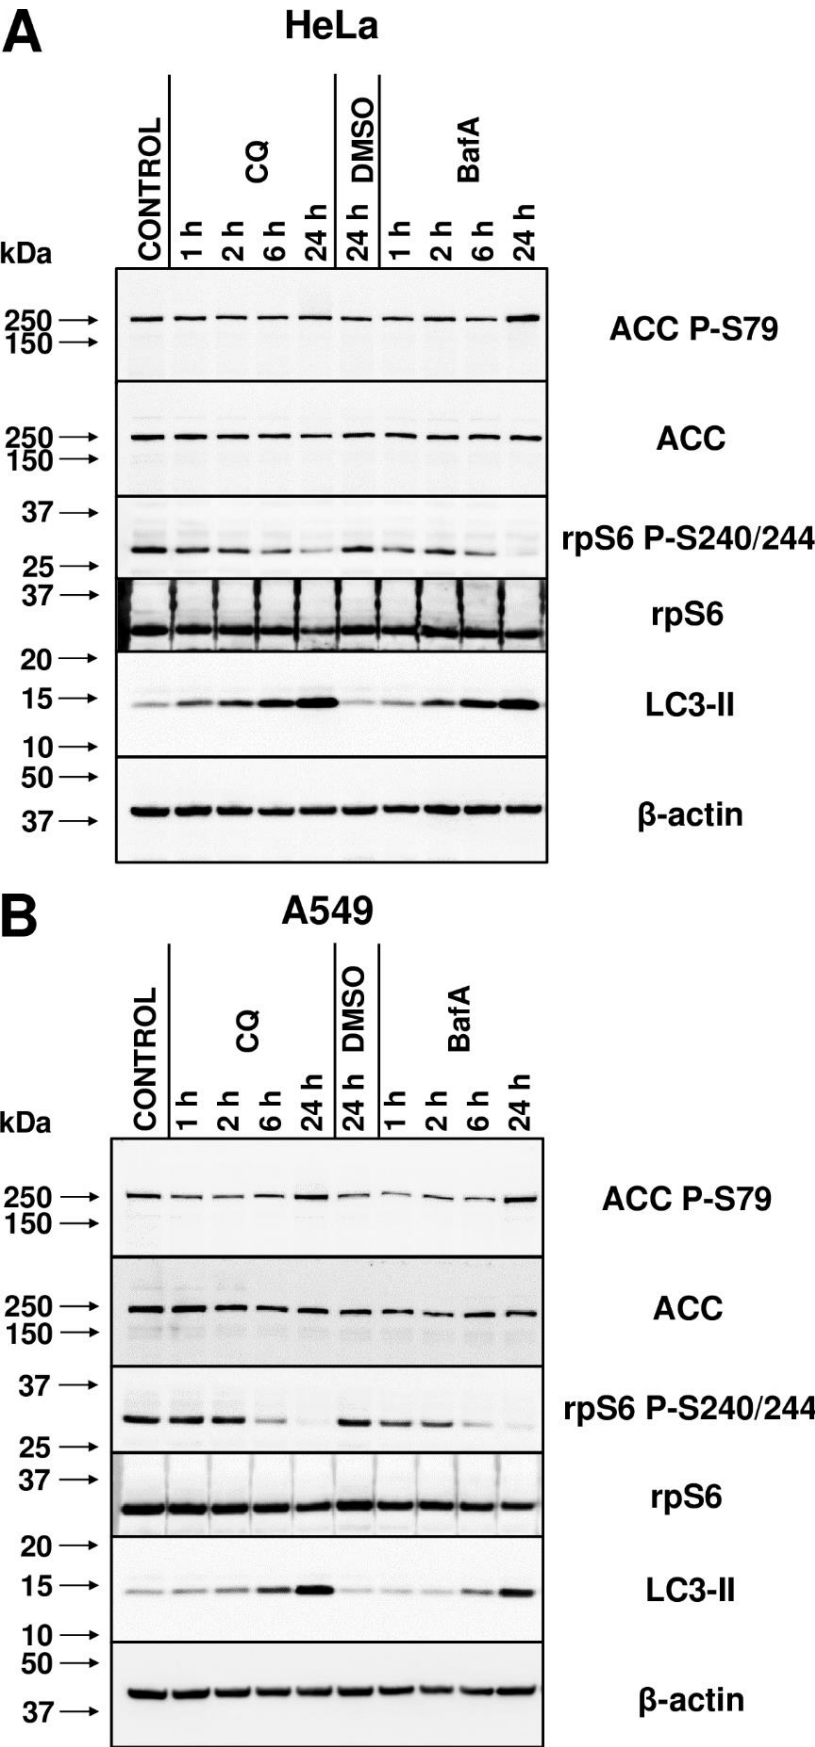

**Supplementary Figure 2. Acute treatment with neither CQ nor BafA enhances AMPK signalling.** **A.** Extracts were prepared from HeLa and A549 cells that had been treated with either 50  $\mu$ M CQ or 200 nM BafA for 1, 2, 6 or 24 h. Alternatively, they were treated with 1:1000 DMSO for 24 h or left untreated (CONTROL). Cell lysates were analysed via immunoblotting with the indicated antibodies. **B.** As for **A**, but with A549 cells. Results are representative of three independent experiments.

Supplementary Figure 3.

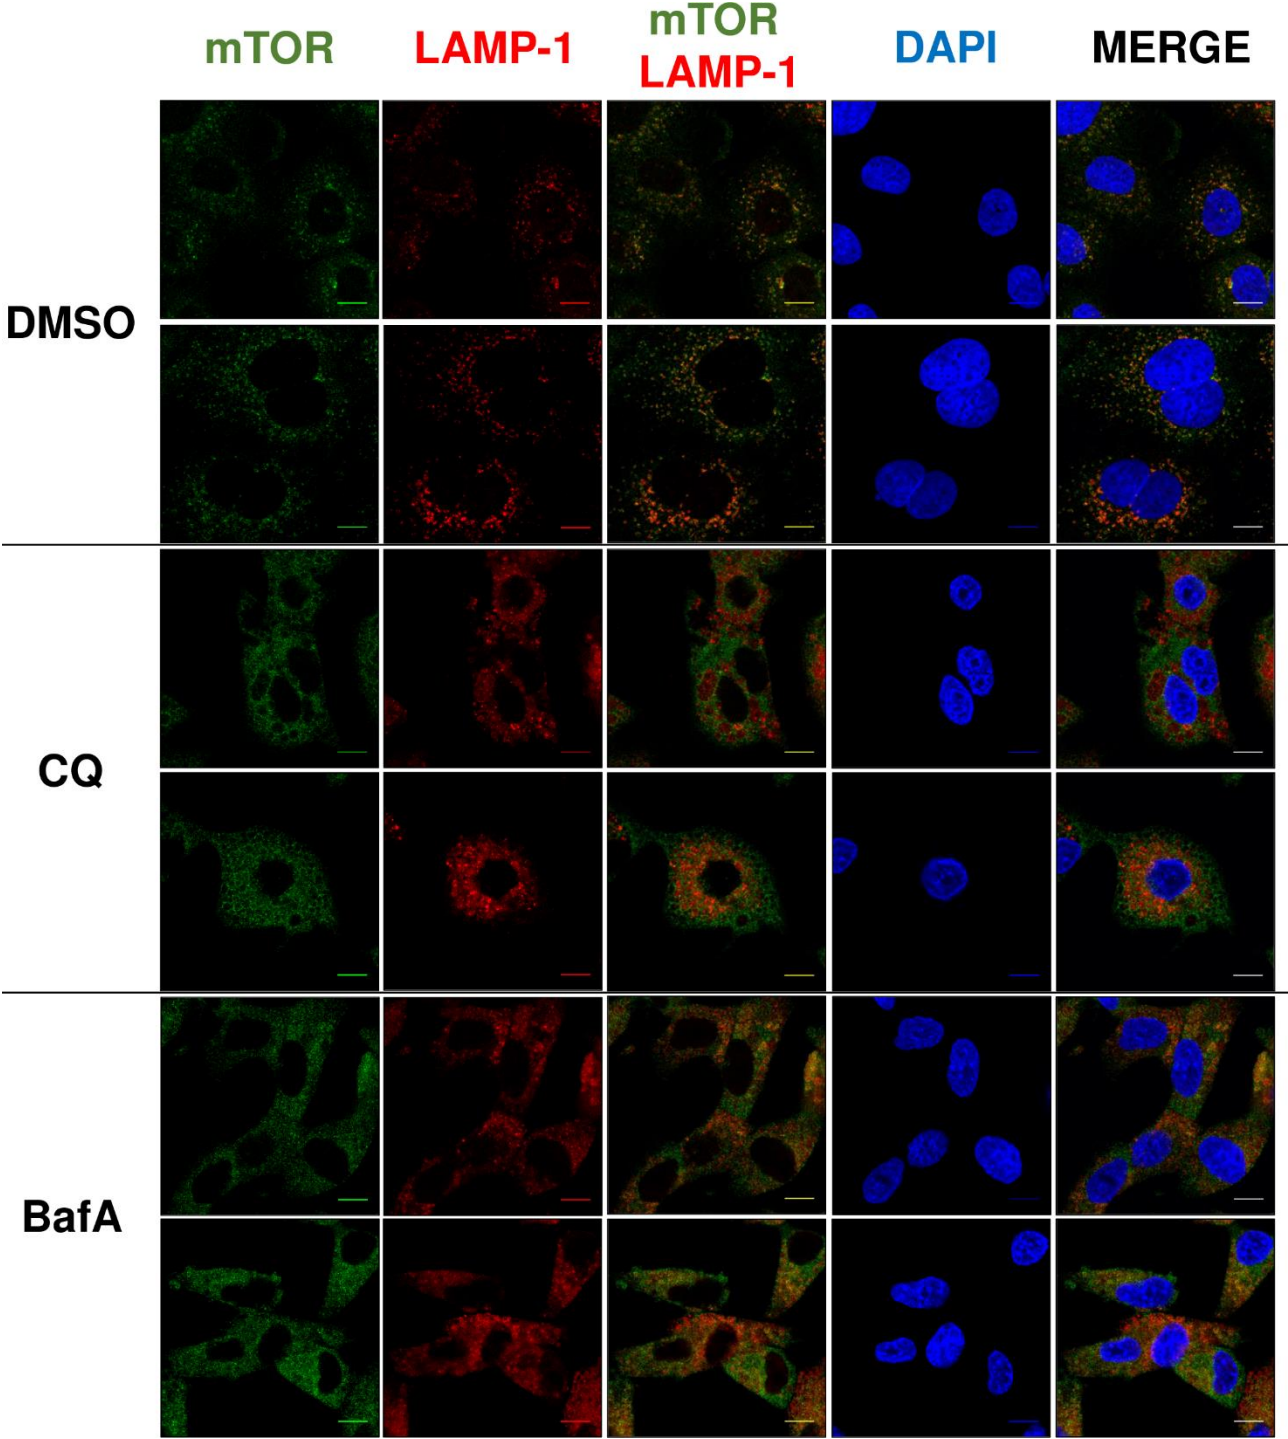

**Supplementary Figure 3. Additional regions of interest from Figure 4A.** See legend to Figure 4A for further information.

Supplementary Figure 4.

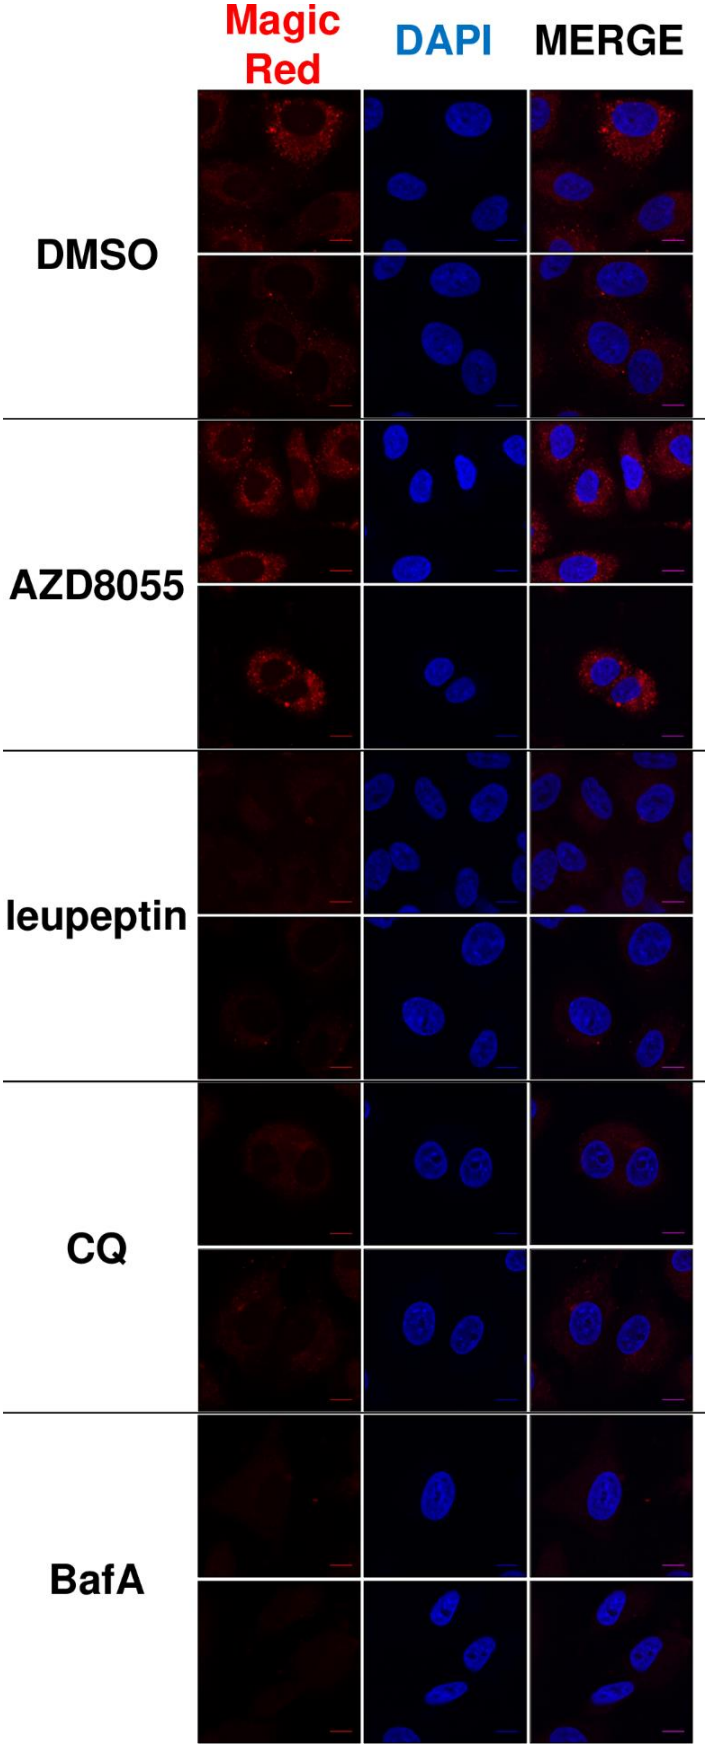

**Supplementary Figure 4. Additional regions of interest from Figure 5C.** See legend to Figure 5C for further information.



Supplementary Figure 5.

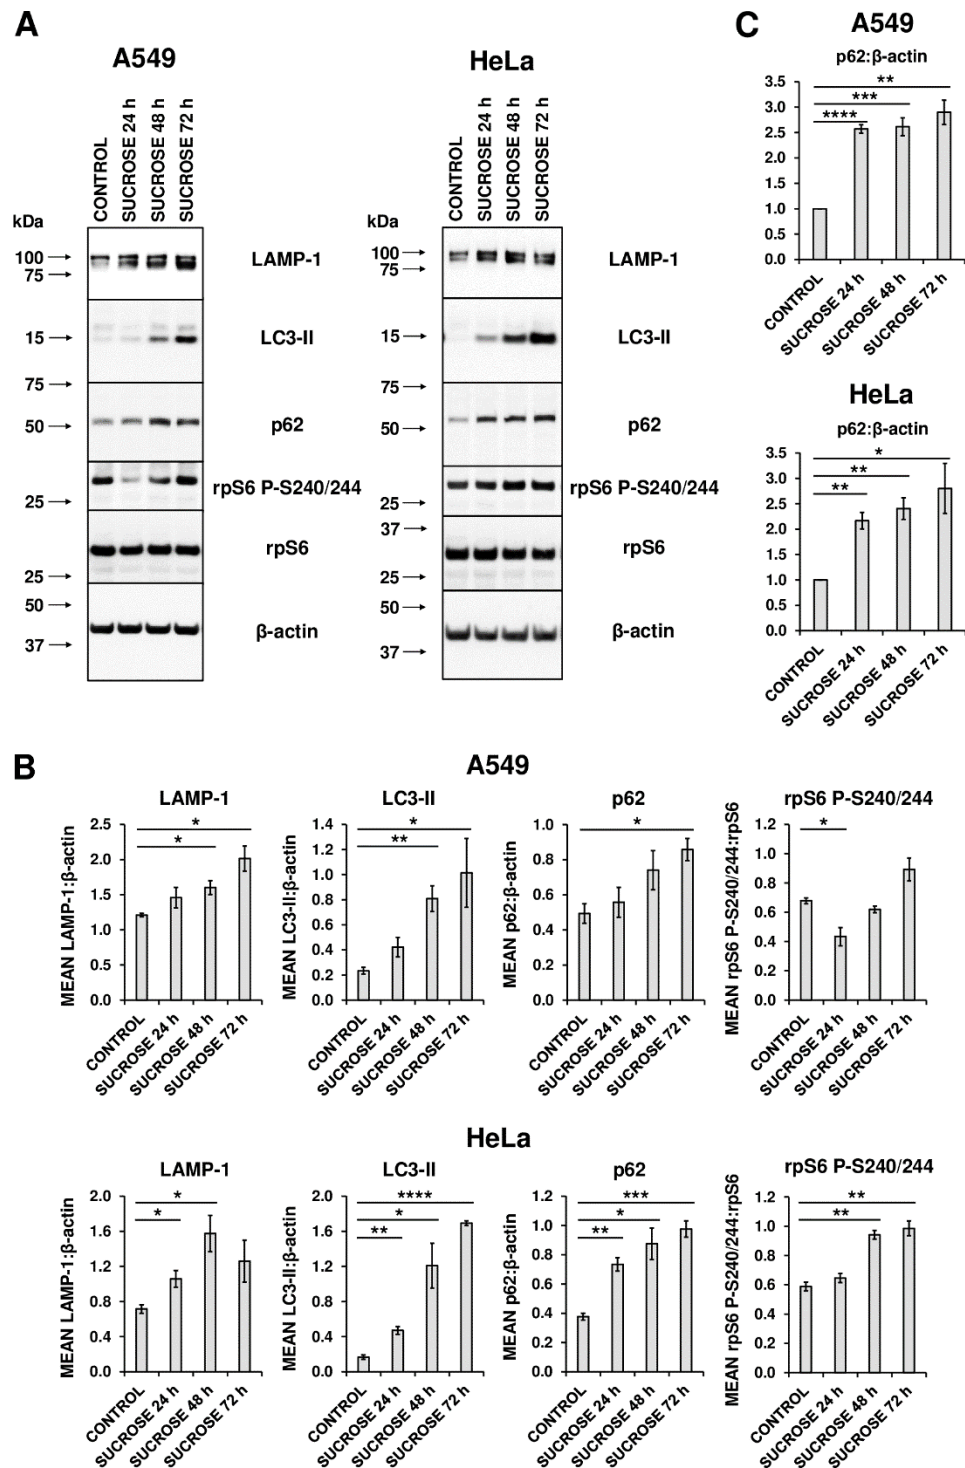

**Supplementary Figure 5. Sucrose treatment mimics lysosomal alkalisation. A.**

Extracts were prepared from HeLa and A549 cells that had been treated with 100 mM sucrose for 24, 48 or 72 h or left untreated (CONTROL). Cell lysates were analysed by immunoblotting with the indicated antibodies. Results are representative of three independent experiments. **B.** LAMP-1, LC3-II and p62 were quantified using densitometric analysis and normalised against  $\beta$ -actin, while the signal for rpS6 P-S240/244 was normalised to total rpS6, represented as the mean of the three biological replicates. **C.** Total RNA extracted from cells treated as in **A** was used as a template for the preparation of complementary DNA, which was then analysed via quantitative real-time PCR employing primers designed to amplify fragments of the coding sequences of *p62*, and the internal control ( $\beta$ -actin). Results are representative of three independent experiments, each performed in technical triplicate and compared against the untreated control.
